# Supplementary material for: New Pd/Co–Ni electrocatalysts for formic acid electrooxidation and their fabrication from inorganic precursor [Co0.14Ni1.86(dipic)2(phen)2(H2O)2]·4H2O
Source: Royal Society of Chemistry journal article supplement (doi:10.1039/d0dt03113e), 2020-01-01
Supplement: d0dt03113e1.pdf [file d0dt03113e1.pdf]

**Table S1**

Selected bond lengths (Å) and bond angles (°) for  $[\text{Co}_{0.14}\text{Ni}_{1.86}(\text{dipic})_2(\text{phen})_2(\text{H}_2\text{O})_2] \cdot 4\text{H}_2\text{O}(\mathbf{1})$ .

| Bond Lengths |            | Bond Angles    |           |
|--------------|------------|----------------|-----------|
| Ni1 Co1—O2   | 2.0909(18) | O2—Ni1 Co1—O1  | 86.69(6)  |
| Ni1 Co1—O1   | 2.0856(14) | O2—Ni1 Co1—N1  | 96.23(7)  |
| Ni1 Co1—N1   | 2.0794(18) | O2—Ni1 Co1—N2  | 91.29(7)  |
| Ni1 Co1—N2   | 2.0807(16) | O2—Ni1 Co1—N3  | 176.37(7) |
| Ni1 Co1—N3   | 2.073(2)   | O2—Ni1 Co1—N4  | 88.33(7)  |
| Ni1 Co1—N4   | 2.0665(18) | O1—Ni1 Co1—N1  | 86.65(6)  |
| Ni2 Co2—N5   | 1.9717(18) | O1—Ni1 Co1—N2  | 176.85(6) |
| Ni2 Co2—N6   | 1.9754(19) | O1—Ni1 Co1—N3  | 91.87(6)  |
| Ni2 Co2—O4b  | 2.019(6)   | O1—Ni1 Co1—N4  | 97.29(6)  |
| N1—C12       | 1.368(3)   | N1—Ni1 Co1—N2  | 95.98(7)  |
| N1—C1        | 1.325(4)   | N1—Ni1 Co1—N3  | 80.35(8)  |
| N2—C22       | 1.323(3)   | N1—Ni1 Co1—N4  | 174.16(8) |
| N2—C23       | 1.357(3)   | N2—Ni1 Co1—N3  | 90.31(7)  |
| N3—C11       | 1.360(3)   | N2—Ni1 Co1—N4  | 80.22(7)  |
| N5—C36       | 1.336(3)   | N3—Ni1 Co1—N4  | 95.16(8)  |
| N5—C32       | 1.328(3)   | N5—Ni2 Co2—N6  | 173.90(8) |
| N4—C24       | 1.350(2)   | N5—Ni2 Co2—O4b | 80.3(2)   |
| N6—C29       | 1.329(3)   | N6—Ni2 Co2—O4b | 105.0(2)  |

**Table S2**Hydrogen bonds parameters for  $[\text{Co}_{0.14}\text{Ni}_{1.86}(\text{dipic})_2(\text{phen})_2(\text{H}_2\text{O})_2] \cdot 4\text{H}_2\text{O}(\mathbf{1})$ .

| D—H···A                       | d(D—H)    | d(H···A)  | d(D···A)  | <(DHA)  |
|-------------------------------|-----------|-----------|-----------|---------|
| C3—H1c3—O3c <sup>i</sup>      | 0.9600    | 2.4700    | 3.260(10) | 139.620 |
| C13—H1c13—O8 <sup>ii</sup>    | 0.9600    | 2.2900    | 3.082(2)  | 138.780 |
| C2—H1c2—O7a <sup>iii</sup>    | 0.9600    | 2.4300    | 3.339(5)  | 158.120 |
| O10—H1o10—O3a                 | 0.836(14) | 1.862(14) | 2.696(3)  | 175.(5) |
| O2—H1o2—O7 <sup>iv</sup>      | 0.85(2)   | 1.86(3)   | 2.700(3)  | 173.(2) |
| O1—H1o1—O6 <sup>ii</sup>      | 0.85(3)   | 1.95(3)   | 2.794(2)  | 174.(3) |
| O11—H1o11—O5 <sup>v</sup>     | 0.84(2)   | 1.90(2)   | 2.719(2)  | 167.(3) |
| O1—H2o1—O13 <sup>ii</sup>     | 0.85(4)   | 1.95(4)   | 2.778(3)  | 167.(3) |
| O2—H2o2—O8 <sup>vi</sup>      | 0.848(17) | 1.883(18) | 2.727(2)  | 174.(3) |
| O13—H1o13—O3b <sup>vii</sup>  | 0.84(3)   | 2.08(3)   | 2.806(7)  | 144.(2) |
| O13—H1o13—C31b <sup>vii</sup> | 0.84(3)   | 2.47(3)   | 3.300(5)  | 172.(3) |
| O9—H1o9—O4a                   | 0.84(2)   | 2.05(2)   | 2.859(3)  | 161.(4) |
| O16—H1o16—O12                 | 0.84(4)   | 2.05(4)   | 2.794(4)  | 148.(3) |
| O16a—H1o16a—O12               | 0.97(5)   | 2.05(4)   | 2.729(9)  | 125.(3) |

Symmetry codes: (i) -x, 1-y, 1-z; (ii) -1+x, 1+y, z; (iii) 1-x, 1-y, 1-z; (iv) x, 1+y, z;

(v) 1-x, -y, 1-z; (vi) 1-x, 1-y, -z; (vii) 1+x, y, z; (viii) -1+x, y, z.
